# Supplementary material for: Pressure tuned incommensurability and guest structure transition in compressed scandium from machine learning atomic simulation
Source: Royal Society of Chemistry journal article supplement (doi:10.1039/d1cp05803g), 2022-01-01
Supplement: d1cp05803g2.pdf [file d1cp05803g2.pdf]

1 Supporting Information

2

3 **Pressure tuned incommensurability and guest structure transition in**  
4 **compressed scandium from machine learning atomic simulation**

5 **Sheng-cai Zhu<sup>1#\*</sup>, Zhen-bo Huang<sup>1#</sup>, Qingyang Hu<sup>2,3</sup>, Liang Xu<sup>4</sup>**

6 1. School of Materials, Shenzhen Campus of Sun Yat-sen University, Shenzhen  
7 518107, China.

8 2 Center for High Pressure Science and Technology Advanced Research, Beijing  
9 100094, P. R. China.

10 3 CAS Center for Excellence in Deep Earth Science, Guangzhou Institute of  
11 Geochemistry, Chinese Academy of Sciences, Guangzhou, P. R. China.

12 4 National Key Laboratory of Shock Wave and Detonation Physics, Institute of Fluid  
13 Physics, China Academy of Engineering Physics, Mianyang 621900, China

14

15

16 AUTHOR INFORMATION

17 **Corresponding Author**

18 \* E-mail:

19 S.-C.Z. (zhushc@mail.sysu.edu.cn)

20

21

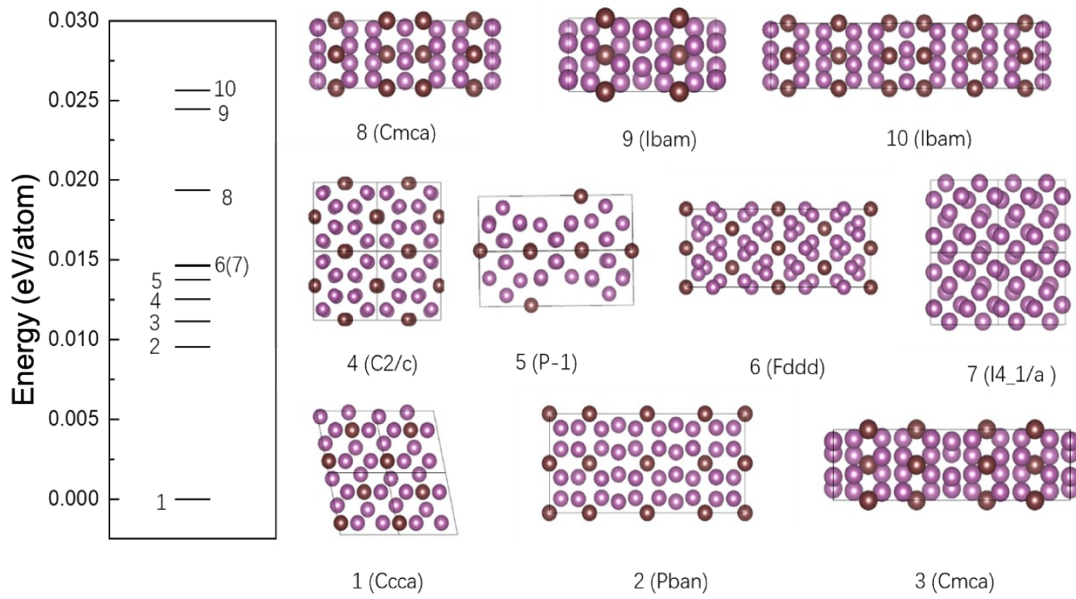

22

23 **Fig. S1.** Configurational energy spectra at 90 GPa from DFT calculation. The  
24 **Structure 1-3**, and **6-10** are the ordinary structures, while **Structure 4** is HG structure  
25 with bcm guest configuration ( $\gamma=1.333$ ), and **Structure 5** is HG structure with fcm  
26 guest configuration ( $\gamma=1.343$ ), both the host framework and guest structure are  
27 distorted.

28

29

30 **Table S1** 10 minimum structure and energy calculation (relative to *Ccca structure*)  
31 comparison between DFT and NN at 90 GPa.

32

| Number | Symttery                | DFT/eV   | NN/eV    | $E_{\text{diff}}$ /meV | Space |
|--------|-------------------------|----------|----------|------------------------|-------|
| 1      | <i>Ccca</i>             | 2.971836 | 2.975333 | 3.4965                 | 68    |
| 2      | <i>Pban</i>             | 2.981398 | 2.982279 | 0.880437               | 50    |
| 3      | <i>Cmca</i>             | 2.982987 | 2.978436 | 4.5515                 | 64    |
| 4      | <i>C2/c</i>             | 2.984378 | 2.989537 | 5.158781               | 15    |
| 5      | <i>P-1</i>              | 2.985592 | 2.993147 | 7.555146               | 2     |
| 6      | <i>Fddd</i>             | 2.986451 | 2.991146 | 4.695438               | 70    |
| 7      | <i>I4<sub>1</sub>/a</i> | 2.986513 | 2.99255  | 6.036813               | 88    |
| 8      | <i>Cmca</i>             | 2.991195 | 2.991704 | 0.509875               | 64    |
| 9      | <i>Ibam</i>             | 2.996282 | 2.987591 | 8.691143               | 72    |
| 10     | <i>Ibam</i>             | 2.99748  | 2.987179 | 10.30085               | 72    |

33

34

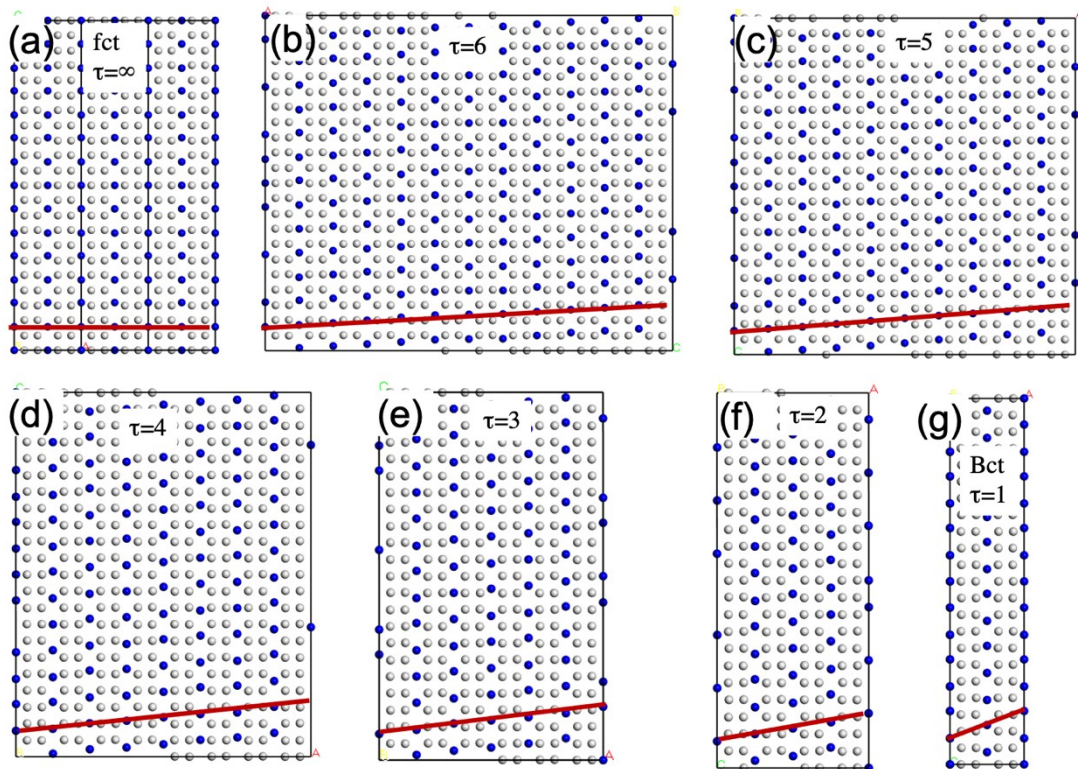

36

37 **Fig. S2.** The same incommensurate ratio ( $\gamma=14/11$ ) H-G structure with different guest  
 38 configuration. (a) H-G structure with fct guest configuration, (b-f) H-G structure with  
 39  $\tau=2, 3, 4, 5,$  and  $6$  in fcm and bcm guest configuration. (g) the H-G structure with bct  
 40 guest configuration. The red lines (in ab plane) guard how the original fct guest transit  
 41 to bct guest.

42

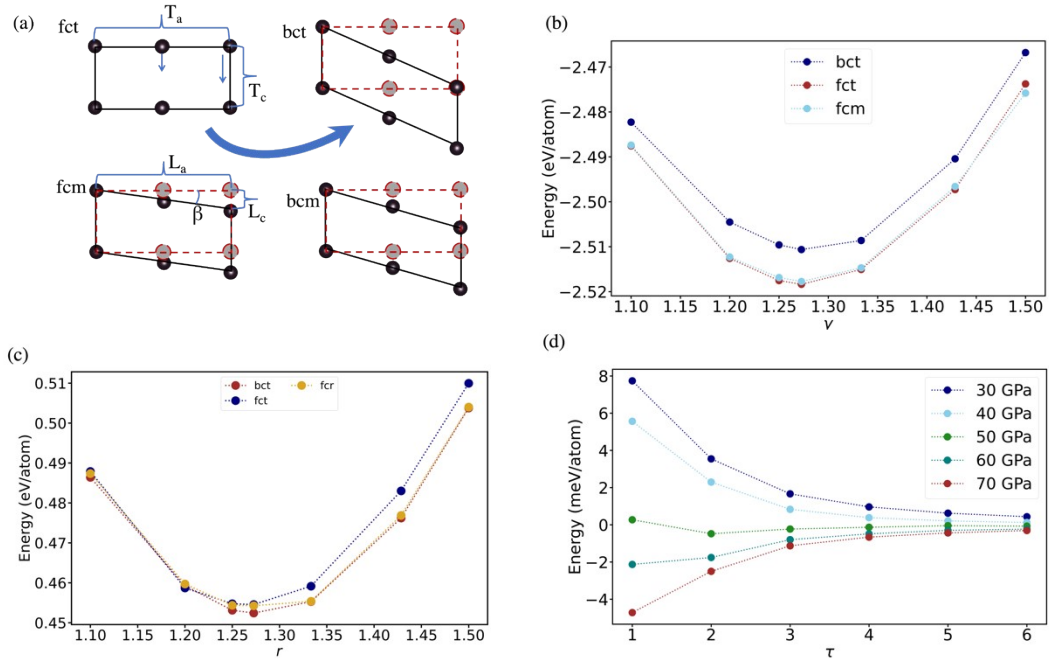

43

44 **Fig. S3.** (a) The scheme of *fct* to *bct* via *fcm* and *bcm*. The energies vs  $\gamma$  at 30 GPa (b),  
 45 and 60 GPa (c), the fcm is  $\tau=5$  with  $\gamma=14/11$ . (d) The relative energies of *fct* ( $\gamma=14/11$ )  
 46 with  $\tau$  from 2 to 6, *fct* and *bct* at 30, 40, 50, 60, 70 GPa.

47

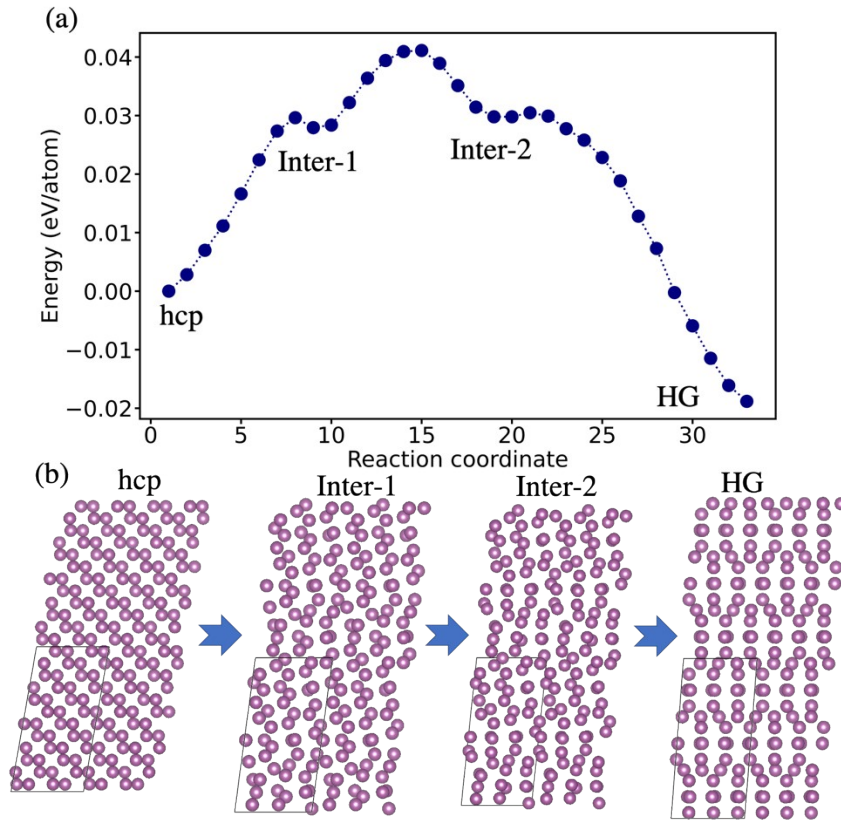

48

49 **Fig. S4. (a)** The energy profile of 48-atom pathway which calculated by neural network  
 50 potential; **(b)** the key structural snaps of the phase transition path. The energy barrier is  
 51 0.041 eV/atom. Inter-1 and Inter-2 are two shallow intermediate structures along the  
 52 hcp to HG structure phase transition.

53

54

55

56 **Structure information of transition pathway**

57

58 32-atom phase transition pathway

59 Hcp structure

60 PBC 7.29163364 7.29176015 10.47955126 89.99970291 90.00009430 91.66525594

61 Sc 5.361422103 5.005009328 2.608710534 CORE 1 Sc Sc 0.0000 1

62 Sc -0.125296971 6.863316860 7.848618052 CORE 2 Sc Sc 0.0000 2

63 Sc 1.821537702 1.360679640 2.608782050 CORE 3 Sc Sc 0.0000 3

64 Sc 1.422896620 4.703796683 8.900625468 CORE 4 Sc Sc 0.0000 4

65 Sc 1.820732233 1.359899758 7.848606884 CORE 5 Sc Sc 0.0000 5

66 Sc 6.088470433 7.258396435 10.468545689 CORE 6 Sc Sc 0.0000 6

67 Sc 5.360626075 5.004223436 7.848678495 CORE 7 Sc Sc 0.0000 7

68 Sc 0.271341625 3.518269117 3.660834052 CORE 8 Sc Sc 0.0000 8

69 Sc 5.174617589 1.059356909 6.796839467 CORE 9 Sc Sc 0.0000 9

70 Sc 0.271377739 3.518374257 6.796762118 CORE 10 Sc Sc 0.0000 10

71 Sc 5.237025526 3.388175663 5.228572174 CORE 11 Sc Sc 0.0000 11

72 Sc 3.811195046 7.162620019 1.556830335 CORE 12 Sc Sc 0.0000 12

73 Sc 1.393226730 2.424613992 10.468528158 CORE 13 Sc Sc 0.0000 13

74 Sc -0.124483567 6.864137958 2.608699985 CORE 14 Sc Sc 0.0000 14

75 Sc 5.174573212 1.059318222 3.660523330 CORE 15 Sc Sc 0.0000 15

76 Sc 2.548669427 3.614099084 5.228517821 CORE 16 Sc Sc 0.0000 16

77 Sc 2.617120825 5.933221716 6.811002908 CORE 17 Sc Sc 0.0000 17

78 Sc 6.368942505 2.288899147 1.571210852 CORE 18 Sc Sc 0.0000 18

79 Sc 1.485221502 7.032562669 10.468541974 CORE 19 Sc Sc 0.0000 19

80 Sc 3.748615421 4.833982309 10.468526622 CORE 20 Sc Sc 0.0000 20

81 Sc 3.626466643 3.218979405 7.848574077 CORE 21 Sc Sc 0.0000 21

82 Sc 3.811183509 7.162618832 8.900726319 CORE 22 Sc Sc 0.0000 22

83 Sc 6.368870587 2.288879798 8.886424965 CORE 23 Sc Sc 0.0000 23

84 Sc 3.627309761 3.219778870 2.608747945 CORE 24 Sc Sc 0.0000 24

85 Sc 4.933084477 6.068852529 5.228653285 CORE 25 Sc Sc 0.0000 25

86 Sc 0.208734652 1.189640799 5.228554548 CORE 26 Sc Sc 0.0000 26

87 Sc 4.052477701 2.153317639 10.468533922 CORE 27 Sc Sc 0.0000 27

88 Sc 2.617204569 5.933283201 3.646441393 CORE 28 Sc Sc 0.0000 28

89 Sc 2.897245626 0.963548084 5.228658307 CORE 29 Sc Sc 0.0000 29

90 Sc 6.437173782 4.607937866 10.468535430 CORE 30 Sc Sc 0.0000 30

91 Sc 0.300785874 5.797694031 5.228503014 CORE 31 Sc Sc 0.0000 31

92 Sc 1.422852725 4.703665273 1.557150982 CORE 32 Sc Sc 0.0000 32

93 end

94 end

95

96 H-g structure

97 PBC 6.93961351 7.53187214 11.29007716 104.59126900 93.81034549 84.29825723

|     |                                  |              |              |              |             |              |             |    |        |    |
|-----|----------------------------------|--------------|--------------|--------------|-------------|--------------|-------------|----|--------|----|
| 98  | Sc                               | 5.906333349  | 4.291379156  | 1.581115315  | CORE        | 1            | Sc          | Sc | 0.0000 | 1  |
| 99  | Sc                               | -0.126579838 | 5.133132698  | 9.311581484  | CORE        | 2            | Sc          | Sc | 0.0000 | 2  |
| 100 | Sc                               | 2.062218130  | 1.132858014  | 2.945902583  | CORE        | 3            | Sc          | Sc | 0.0000 | 3  |
| 101 | Sc                               | 2.061197879  | 3.488445681  | 8.403742664  | CORE        | 4            | Sc          | Sc | 0.0000 | 4  |
| 102 | Sc                               | 1.047467919  | -1.370942381 | 7.264693966  | CORE        | 5            | Sc          | Sc | 0.0000 | 5  |
| 103 | Sc                               | 4.890728121  | 4.143242039  | 11.358373049 | CORE        | 6            | Sc          | Sc | 0.0000 | 6  |
| 104 | Sc                               | 4.891205759  | 2.965088170  | 8.629368780  | CORE        | 7            | Sc          | Sc | 0.0000 | 7  |
| 105 | Sc                               | -0.125547122 | 2.777562933  | 3.853740925  | CORE        | 8            | Sc          | Sc | 0.0000 | 8  |
| 106 | Sc                               | 5.157165666  | -0.847693160 | 7.039089194  | CORE        | 9            | Sc          | Sc | 0.0000 | 9  |
| 107 | Sc                               | 0.139413949  | 1.320440464  | 7.721475985  | CORE        | 10           | Sc          | Sc | 0.0000 | 10 |
| 108 | Sc                               | 4.891646407  | 1.787660056  | 5.900482969  | CORE        | 11           | Sc          | Sc | 0.0000 | 11 |
| 109 | Sc                               | 3.718598147  | 5.936026760  | 2.489060606  | CORE        | 12           | Sc          | Sc | 0.0000 | 12 |
| 110 | Sc                               | 1.046967961  | -0.193338991 | 9.993547394  | CORE        | 13           | Sc          | Sc | 0.0000 | 13 |
| 111 | Sc                               | 0.888606395  | 6.459512595  | 2.263602166  | CORE        | 14           | Sc          | Sc | 0.0000 | 14 |
| 112 | Sc                               | 4.892249875  | 0.609517920  | 3.171527584  | CORE        | 15           | Sc          | Sc | 0.0000 | 15 |
| 113 | Sc                               | 2.061606820  | 2.310735867  | 5.674878512  | CORE        | 16           | Sc          | Sc | 0.0000 | 16 |
| 114 | Sc                               | 3.983523997  | 4.478864561  | 6.356904117  | CORE        | 17           | Sc          | Sc | 0.0000 | 17 |
| 115 | Sc                               | 6.814435040  | 1.600208615  | 1.124676461  | CORE        | 18           | Sc          | Sc | 0.0000 | 18 |
| 116 | Sc                               | 2.060748421  | 4.666280052  | 11.132776079 | CORE        | 19           | Sc          | Sc | 0.0000 | 19 |
| 117 | Sc                               | 2.968911183  | 1.974907725  | 10.675775225 | CORE        | 20           | Sc          | Sc | 0.0000 | 20 |
| 118 | Sc                               | 2.969253371  | 0.797090910  | 7.946910931  | CORE        | 21           | Sc          | Sc | 0.0000 | 21 |
| 119 | Sc                               | 3.983047886  | 5.656322411  | 9.085808791  | CORE        | 22           | Sc          | Sc | 0.0000 | 22 |
| 120 | Sc                               | 5.156630035  | 0.329741787  | 9.767906247  | CORE        | 23           | Sc          | Sc | 0.0000 | 23 |
| 121 | Sc                               | 3.984062452  | 3.300776433  | 3.627964860  | CORE        | 24           | Sc          | Sc | 0.0000 | 24 |
| 122 | Sc                               | 5.905987774  | 5.468748747  | 4.310116427  | CORE        | 25           | Sc          | Sc | 0.0000 | 25 |
| 123 | Sc                               | 0.139867073  | 0.142382306  | 4.992635940  | CORE        | 26           | Sc          | Sc | 0.0000 | 26 |
| 124 | Sc                               | 3.234329173  | -0.660228269 | 11.814795567 | CORE        | 27           | Sc          | Sc | 0.0000 | 27 |
| 125 | Sc                               | 1.796261756  | 4.945693174  | 4.535748092  | CORE        | 28           | Sc          | Sc | 0.0000 | 28 |
| 126 | Sc                               | 2.969771209  | -0.380610047 | 5.217949055  | CORE        | 29           | Sc          | Sc | 0.0000 | 29 |
| 127 | Sc                               | 7.078460701  | 2.498040567  | 10.450437466 | CORE        | 30           | Sc          | Sc | 0.0000 | 30 |
| 128 | Sc                               | -0.126017111 | 3.955691105  | 6.582691745  | CORE        | 31           | Sc          | Sc | 0.0000 | 31 |
| 129 | Sc                               | 1.796657035  | 3.768070228  | 1.806740342  | CORE        | 32           | Sc          | Sc | 0.0000 | 32 |
| 130 | end                              |              |              |              |             |              |             |    |        |    |
| 131 | end                              |              |              |              |             |              |             |    |        |    |
| 132 |                                  |              |              |              |             |              |             |    |        |    |
| 133 |                                  |              |              |              |             |              |             |    |        |    |
| 134 | 42-atom phase transition pathway |              |              |              |             |              |             |    |        |    |
| 135 | Hcp structure                    |              |              |              |             |              |             |    |        |    |
| 136 | PBC                              | 7.23849183   | 11.84488570  | 9.82627607   | 69.15778951 | 101.40597487 | 77.17319790 |    |        |    |
| 137 | Sc                               | 6.713550014  | 5.828863624  | 4.547355210  | CORE        | 1            | Sc          | Sc | 0.0000 | 1  |
| 138 | Sc                               | 5.564274372  | 11.145488282 | 3.450548665  | CORE        | 2            | Sc          | Sc | 0.0000 | 2  |
| 139 | Sc                               | 6.873178175  | 7.525592148  | 1.948418805  | CORE        | 3            | Sc          | Sc | 0.0000 | 3  |



|     |     |              |              |             |      |    |    |    |        |    |
|-----|-----|--------------|--------------|-------------|------|----|----|----|--------|----|
| 140 | Sc  | 5.566926900  | 13.470564906 | 4.921656923 | CORE | 4  | Sc | Sc | 0.0000 | 4  |
| 141 | Sc  | 2.792544819  | 4.540885617  | 8.037659026 | CORE | 5  | Sc | Sc | 0.0000 | 5  |
| 142 | Sc  | 3.212719455  | 9.130723810  | 5.430550469 | CORE | 6  | Sc | Sc | 0.0000 | 6  |
| 143 | Sc  | 4.054598269  | 3.329841709  | 2.963906233 | CORE | 7  | Sc | Sc | 0.0000 | 7  |
| 144 | Sc  | 7.847890044  | 9.616017797  | 4.053601642 | CORE | 8  | Sc | Sc | 0.0000 | 8  |
| 145 | Sc  | -0.789933745 | 2.941051191  | 4.537695895 | CORE | 9  | Sc | Sc | 0.0000 | 9  |
| 146 | Sc  | 4.437184035  | 6.845448316  | 6.677598144 | CORE | 10 | Sc | Sc | 0.0000 | 10 |
| 147 | Sc  | -0.496900384 | 7.773594739  | 8.731324718 | CORE | 11 | Sc | Sc | 0.0000 | 11 |
| 148 | Sc  | 2.916300445  | 10.962080869 | 3.212404172 | CORE | 12 | Sc | Sc | 0.0000 | 12 |
| 149 | Sc  | 1.796260176  | 4.334058238  | 5.093815471 | CORE | 13 | Sc | Sc | 0.0000 | 13 |
| 150 | Sc  | 4.409162974  | 9.270967371  | 8.165338629 | CORE | 14 | Sc | Sc | 0.0000 | 14 |
| 151 | Sc  | 4.113058017  | 3.794074145  | 0.195273287 | CORE | 15 | Sc | Sc | 0.0000 | 15 |
| 152 | Sc  | 3.249360550  | 14.500385355 | 7.062941945 | CORE | 16 | Sc | Sc | 0.0000 | 16 |
| 153 | Sc  | 2.919578587  | 11.511090738 | 0.496160242 | CORE | 17 | Sc | Sc | 0.0000 | 17 |
| 154 | Sc  | 1.029470813  | 2.153073474  | 2.808073291 | CORE | 18 | Sc | Sc | 0.0000 | 18 |
| 155 | Sc  | 4.059364170  | 5.743641198  | 4.276881092 | CORE | 19 | Sc | Sc | 0.0000 | 19 |
| 156 | Sc  | 1.799094293  | 7.232615980  | 3.785275859 | CORE | 20 | Sc | Sc | 0.0000 | 20 |
| 157 | Sc  | 1.774555940  | 6.757437663  | 6.543005080 | CORE | 21 | Sc | Sc | 0.0000 | 21 |
| 158 | Sc  | 1.392412524  | 9.932878492  | 7.161902957 | CORE | 22 | Sc | Sc | 0.0000 | 22 |
| 159 | Sc  | 7.841561510  | 12.047343463 | 5.388317097 | CORE | 23 | Sc | Sc | 0.0000 | 23 |
| 160 | Sc  | 4.564025953  | 3.793174565  | 6.325060431 | CORE | 24 | Sc | Sc | 0.0000 | 24 |
| 161 | Sc  | 2.853575007  | 1.363725608  | 1.070848166 | CORE | 25 | Sc | Sc | 0.0000 | 25 |
| 162 | Sc  | 5.604885892  | 10.602199772 | 6.171256137 | CORE | 26 | Sc | Sc | 0.0000 | 26 |
| 163 | Sc  | 6.391722172  | 2.374952011  | 0.665435045 | CORE | 27 | Sc | Sc | 0.0000 | 27 |
| 164 | Sc  | 7.899779793  | 10.099460205 | 1.312527444 | CORE | 28 | Sc | Sc | 0.0000 | 28 |
| 165 | Sc  | -0.474297574 | 5.366253206  | 7.272473505 | CORE | 29 | Sc | Sc | 0.0000 | 29 |
| 166 | Sc  | 4.107780687  | 6.224589386  | 1.532203186 | CORE | 30 | Sc | Sc | 0.0000 | 30 |
| 167 | Sc  | 5.093936272  | 8.312203694  | 3.626797867 | CORE | 31 | Sc | Sc | 0.0000 | 31 |
| 168 | Sc  | 1.515909515  | 6.708377331  | 0.146674209 | CORE | 32 | Sc | Sc | 0.0000 | 32 |
| 169 | Sc  | 1.800441608  | 4.880200765  | 2.373319731 | CORE | 33 | Sc | Sc | 0.0000 | 33 |
| 170 | Sc  | 5.574589911  | 13.026688794 | 7.662303737 | CORE | 34 | Sc | Sc | 0.0000 | 34 |
| 171 | Sc  | 6.389039353  | 4.698478013  | 2.137715547 | CORE | 35 | Sc | Sc | 0.0000 | 35 |
| 172 | Sc  | 0.999509691  | 13.115469048 | 7.789283773 | CORE | 36 | Sc | Sc | 0.0000 | 36 |
| 173 | Sc  | 3.302071635  | 11.686557777 | 8.338169570 | CORE | 37 | Sc | Sc | 0.0000 | 37 |
| 174 | Sc  | 2.921091845  | 8.609876073  | 1.799591048 | CORE | 38 | Sc | Sc | 0.0000 | 38 |
| 175 | Sc  | 7.898233845  | 12.516065289 | 2.621302332 | CORE | 39 | Sc | Sc | 0.0000 | 39 |
| 176 | Sc  | 5.245548565  | 10.016299454 | 1.038543744 | CORE | 40 | Sc | Sc | 0.0000 | 40 |
| 177 | Sc  | 6.708047808  | 8.184817013  | 5.998687031 | CORE | 41 | Sc | Sc | 0.0000 | 41 |
| 178 | Sc  | 3.270377767  | 12.096570536 | 5.605481282 | CORE | 42 | Sc | Sc | 0.0000 | 42 |
| 179 | end |              |              |             |      |    |    |    |        |    |
| 180 | end |              |              |             |      |    |    |    |        |    |
| 181 |     |              |              |             |      |    |    |    |        |    |

|     |               |              |              |             |             |              |             |
|-----|---------------|--------------|--------------|-------------|-------------|--------------|-------------|
| 182 | H-g structure |              |              |             |             |              |             |
| 183 | PBC           | 7.53730922   | 11.68241408  | 10.74085236 | 62.82005405 | 102.81376934 | 74.73465678 |
| 184 | Sc            | 8.120184619  | 6.214083909  | 5.403346925 | CORE        | 1 Sc Sc      | 0.0000 1    |
| 185 | Sc            | 6.483247661  | 11.298248041 | 4.151596231 | CORE        | 2 Sc Sc      | 0.0000 2    |
| 186 | Sc            | 7.887712188  | 7.613645121  | 2.905839274 | CORE        | 3 Sc Sc      | 0.0000 3    |
| 187 | Sc            | 5.063921582  | 13.799841131 | 4.158128252 | CORE        | 4 Sc Sc      | 0.0000 4    |
| 188 | Sc            | 1.977705763  | 6.060834756  | 7.913464824 | CORE        | 5 Sc Sc      | 0.0000 5    |
| 189 | Sc            | 4.120567120  | 9.971151933  | 5.403208080 | CORE        | 6 Sc Sc      | 0.0000 6    |
| 190 | Sc            | 4.349944773  | 3.856884563  | 2.905946218 | CORE        | 7 Sc Sc      | 0.0000 7    |
| 191 | Sc            | 9.063312487  | 10.042942663 | 4.157821057 | CORE        | 8 Sc Sc      | 0.0000 8    |
| 192 | Sc            | -0.592538331 | 3.784329425  | 4.151588298 | CORE        | 9 Sc Sc      | 0.0000 9    |
| 193 | Sc            | 4.340022430  | 7.388997253  | 6.661692359 | CORE        | 10 Sc Sc     | 0.0000 10   |
| 194 | Sc            | -2.021300105 | 9.818152104  | 7.913623459 | CORE        | 11 Sc Sc     | 0.0000 11   |
| 195 | Sc            | 3.888281568  | 11.370570201 | 2.906163288 | CORE        | 12 Sc Sc     | 0.0000 12   |
| 196 | Sc            | 3.163775540  | 4.959476480  | 5.409946639 | CORE        | 13 Sc Sc     | 0.0000 13   |
| 197 | Sc            | 2.934854325  | 11.072767862 | 7.906924128 | CORE        | 14 Sc Sc     | 0.0000 14   |
| 198 | Sc            | 2.955376402  | 4.010224269  | 0.395862543 | CORE        | 15 Sc Sc     | 0.0000 15   |
| 199 | Sc            | 3.877621756  | 14.901941581 | 6.661501665 | CORE        | 16 Sc Sc     | 0.0000 16   |
| 200 | Sc            | 2.493337720  | 11.523228712 | 0.396002249 | CORE        | 17 Sc Sc     | 0.0000 17   |
| 201 | Sc            | 0.593088195  | 2.682420968  | 1.647890736 | CORE        | 18 Sc Sc     | 0.0000 18   |
| 202 | Sc            | 5.525675666  | 6.286347514  | 4.157798476 | CORE        | 19 Sc Sc     | 0.0000 19   |
| 203 | Sc            | 2.944940978  | 7.541542455  | 4.151284076 | CORE        | 20 Sc Sc     | 0.0000 20   |
| 204 | Sc            | 1.758739822  | 8.643293142  | 6.655178672 | CORE        | 21 Sc Sc     | 0.0000 21   |
| 205 | Sc            | 0.340219391  | 11.145509823 | 6.661493938 | CORE        | 22 Sc Sc     | 0.0000 22   |
| 206 | Sc            | 7.658912976  | 13.727694769 | 5.403606723 | CORE        | 23 Sc Sc     | 0.0000 23   |
| 207 | Sc            | 5.758976159  | 4.886583388  | 6.655524465 | CORE        | 24 Sc Sc     | 0.0000 24   |
| 208 | Sc            | 3.173721327  | 1.427661494  | 1.654076137 | CORE        | 25 Sc Sc     | 0.0000 25   |
| 209 | Sc            | 5.296603519  | 12.400053333 | 6.655289360 | CORE        | 26 Sc Sc     | 0.0000 26   |
| 210 | Sc            | 5.535529400  | 2.754758220  | 0.402215179 | CORE        | 27 Sc Sc     | 0.0000 27   |
| 211 | Sc            | 7.668527284  | 10.195735584 | 1.647899605 | CORE        | 28 Sc Sc     | 0.0000 28   |
| 212 | Sc            | -0.602323436 | 7.316106724  | 7.907240970 | CORE        | 29 Sc Sc     | 0.0000 29   |
| 213 | Sc            | 4.130965874  | 6.439651827  | 1.647662078 | CORE        | 30 Sc Sc     | 0.0000 30   |
| 214 | Sc            | 5.307188172  | 8.868741000  | 2.899654633 | CORE        | 31 Sc Sc     | 0.0000 31   |
| 215 | Sc            | 1.536395754  | 6.511918988  | 0.402449537 | CORE        | 32 Sc Sc     | 0.0000 32   |
| 216 | Sc            | 1.769109584  | 5.111721749  | 2.899623608 | CORE        | 33 Sc Sc     | 0.0000 33   |
| 217 | Sc            | 6.472858538  | 14.829283289 | 7.907272214 | CORE        | 34 Sc Sc     | 0.0000 34   |
| 218 | Sc            | 6.711543512  | 5.184528597  | 1.653936832 | CORE        | 35 Sc Sc     | 0.0000 35   |
| 219 | Sc            | 1.516022811  | 13.574529653 | 7.913437408 | CORE        | 36 Sc Sc     | 0.0000 36   |
| 220 | Sc            | 4.110570740  | 13.502446737 | 9.158865711 | CORE        | 37 Sc Sc     | 0.0000 37   |
| 221 | Sc            | 2.712264712  | 8.941538329  | 1.654252004 | CORE        | 38 Sc Sc     | 0.0000 38   |
| 222 | Sc            | 8.844712535  | 12.624796641 | 2.899817479 | CORE        | 39 Sc Sc     | 0.0000 39   |
| 223 | Sc            | 5.073610640  | 10.268231901 | 0.402274784 | CORE        | 40 Sc Sc     | 0.0000 40   |

224 Sc 6.701428331 8.716186523 5.409626804 CORE 41 Sc Sc 0.0000 41  
225 Sc 2.701570206 12.472643831 5.409637321 CORE 42 Sc Sc 0.0000 42  
226 end  
227 end  
228
